# Supplementary material for: Links between peptides and Mn oxide: nano-sized manganese oxide embedded in a peptide matrix
Source: Royal Society of Chemistry journal article supplement (doi:10.1039/c8nj02119h), 2018-01-01
Supplement: c8nj02119h1.pdf [file c8nj02119h1.pdf]

## Electronic Supplementary Information

# Links Between peptide and Mn oxide: Nano-sized manganese oxide embedded in a peptide matrix

Mohammad Mahdi Najafpour,<sup>\*a-c</sup> Sepideh Madadkhani,<sup>a</sup> Somayyeh Akbarian,<sup>a</sup> Zahra Zand,<sup>a</sup> Małgorzata Hołyńska,<sup>d</sup> Mohsen Kompany-Zareh,<sup>a,b</sup> Tatsuya Tomo,<sup>e</sup> Jitendra Pal Singh,<sup>f</sup> Keun Hwa Chae<sup>f</sup> and Suleyman I. Allakhverdiev<sup>\*g-i</sup>

<sup>a</sup>Department of Chemistry, Institute for Advanced Studies in Basic Sciences (IASBS), Zanjan, 45137-66731, Iran

<sup>b</sup>Center of Climate Change and Global Warming, Institute for Advanced Studies in Basic Sciences (IASBS), Zanjan, 45137-66731, Iran

<sup>c</sup>Research Center for Basic Sciences & Modern Technologies (RBST), Institute for Advanced Studies in Basic Sciences (IASBS), Zanjan 45137-66731, Iran

<sup>d</sup>Fachbereich Chemie and Wissenschaftliches Zentrum für Materialwissenschaften (WZMW), Philipps-Universität Marburg, Hans-Meerwein-Straße, D-35032 Marburg, Germany

<sup>e</sup>Department of Biology, Faculty of Science, Tokyo University of Science, Kagurazaka 1-3, Shinjuku-ku, Tokyo 162-8601, Japan

<sup>f</sup>Advanced Analysis Center, Korea Institute of Science and Technology, Seoul 02792, Republic of Korea

<sup>g</sup>Controlled Photobiosynthesis Laboratory, Institute of Plant Physiology, Russian Academy of Sciences, Botanicheskaya Street 35, Moscow 127276, Russia

<sup>h</sup>Institute of Basic Biological Problems, Russian Academy of Sciences, Pushchino, Moscow Region 142290, Russia

<sup>i</sup>Department of Plant Physiology, Faculty of Biology, M.V. Lomonosov Moscow State University, Leninskie Gory 1-12, Moscow 119991, Russia

<sup>\*</sup>Corresponding authors; Phone: (+98) 24 3315 3201; E-mail: [mmnajafpour@iasbs.ac.ir](mailto:mmnajafpour@iasbs.ac.ir); Phone: (+7) 496 773 1837; Fax: (+7) 496 7330 532; E-mail: [suleyman.allakhverdiev@gmail.com](mailto:suleyman.allakhverdiev@gmail.com)

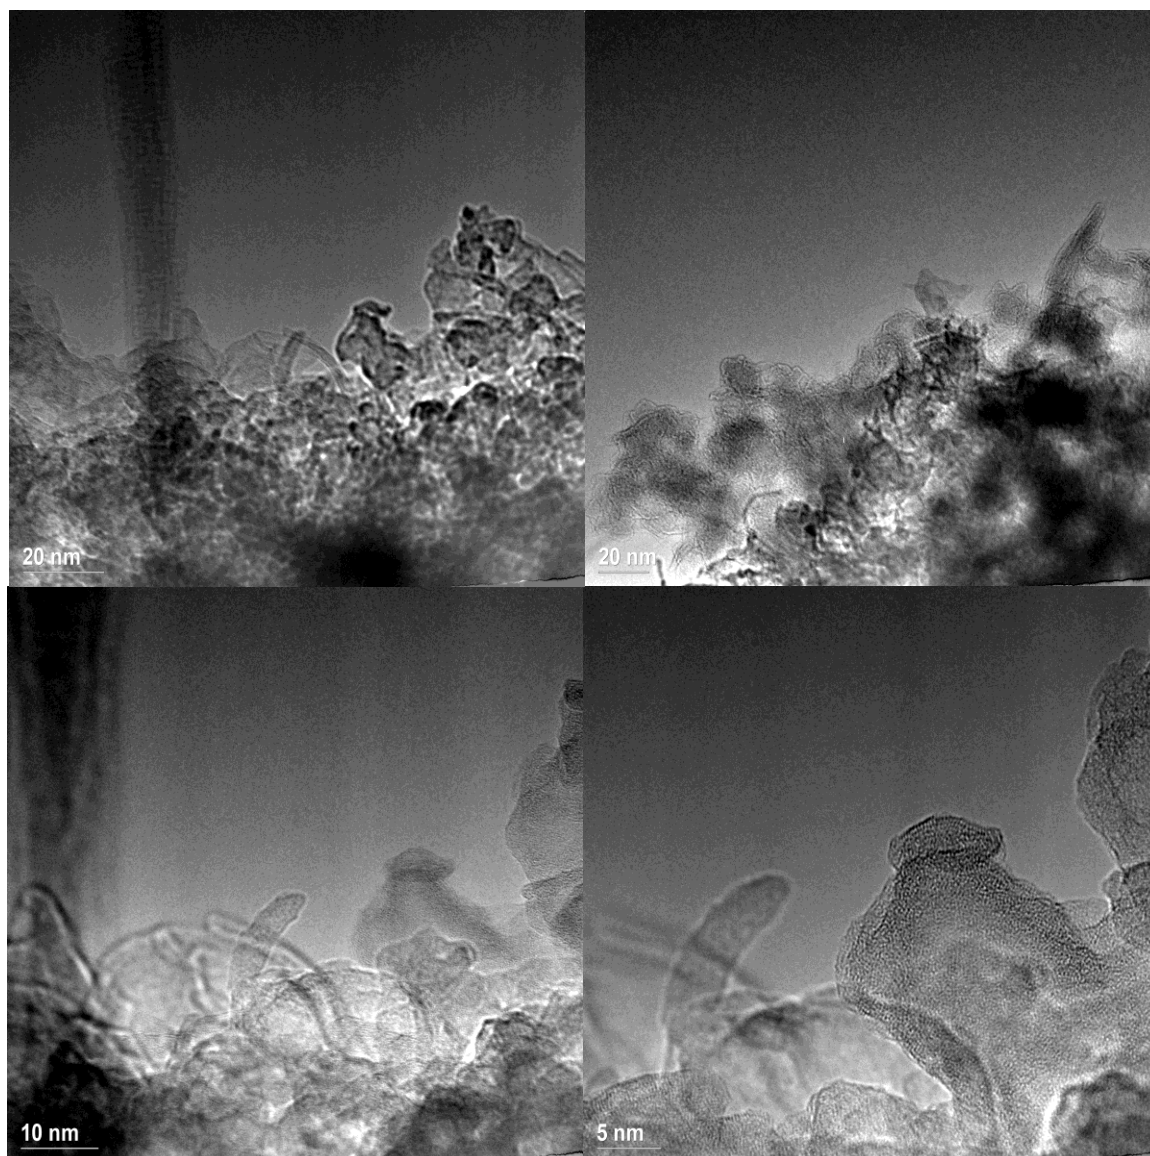

Fig. S1 TEM and HRTEM images of Mn oxide.

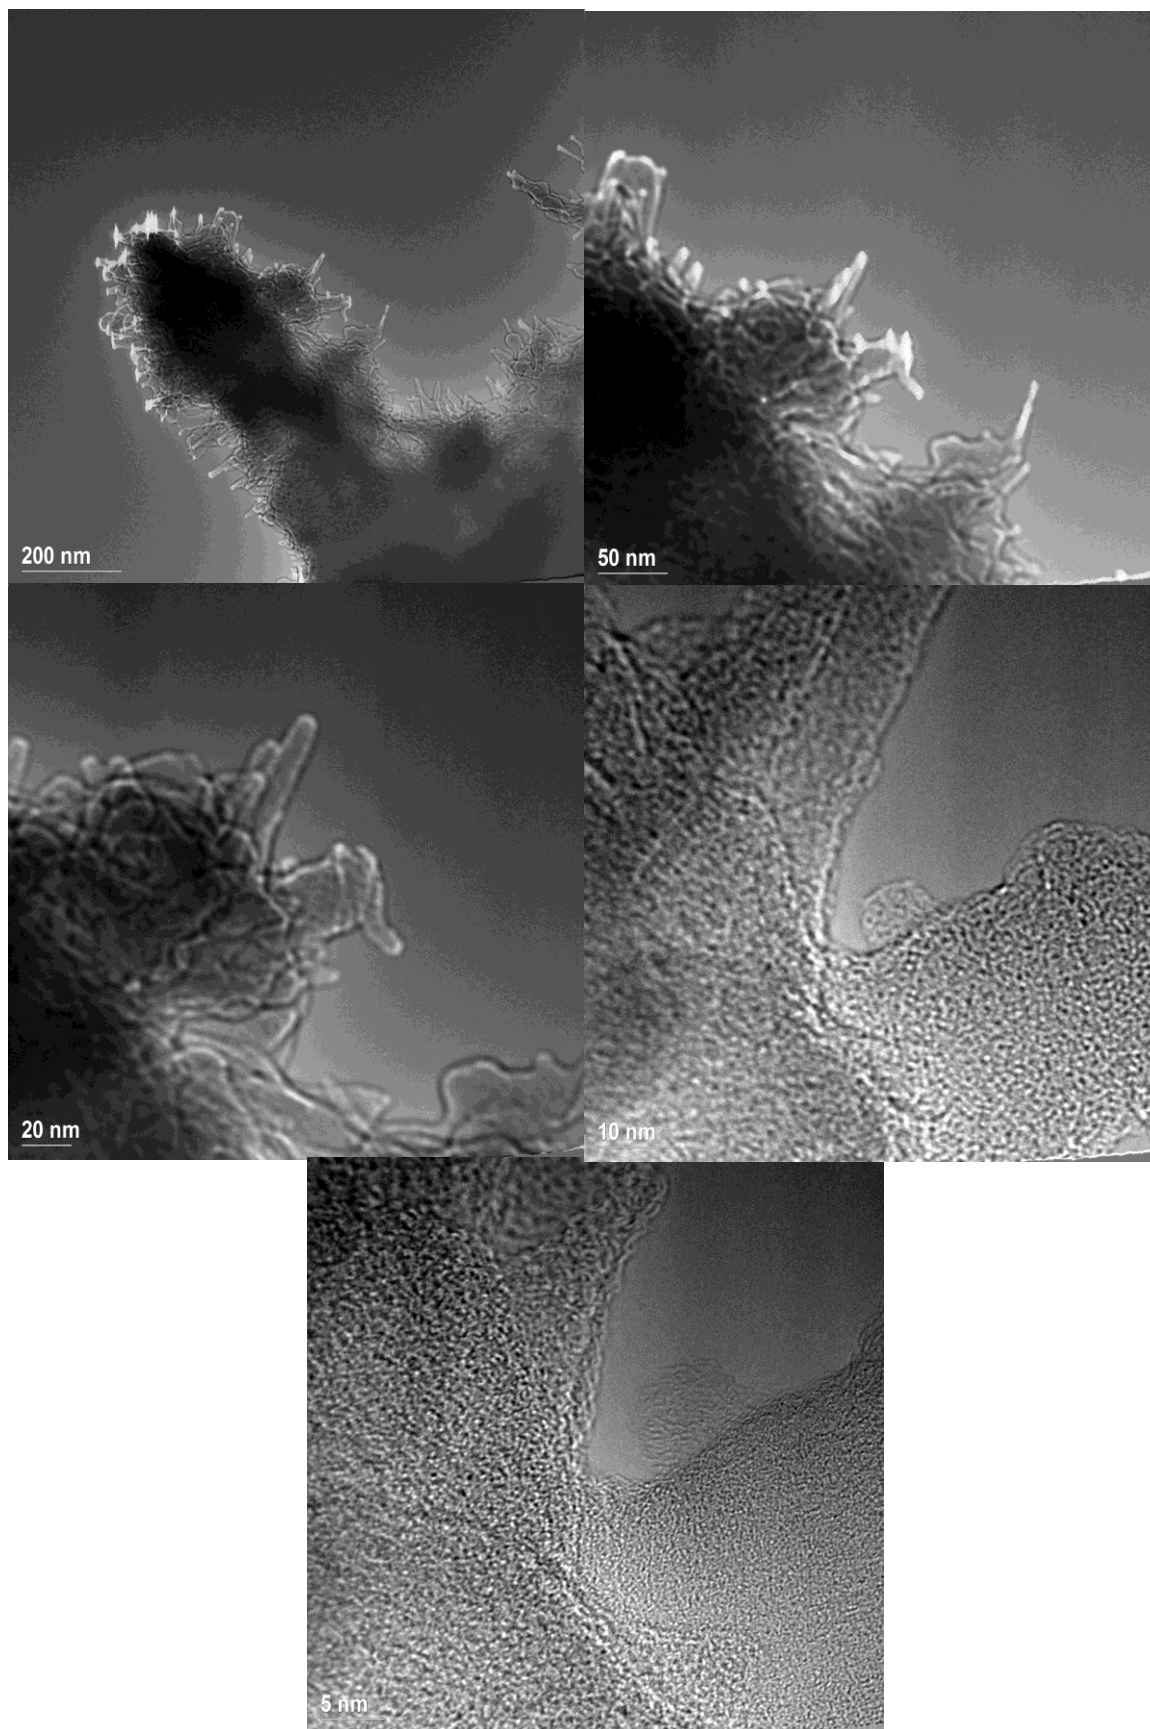

Fig. S2 TEM and HRTEM images of poly-L-tyrosine.

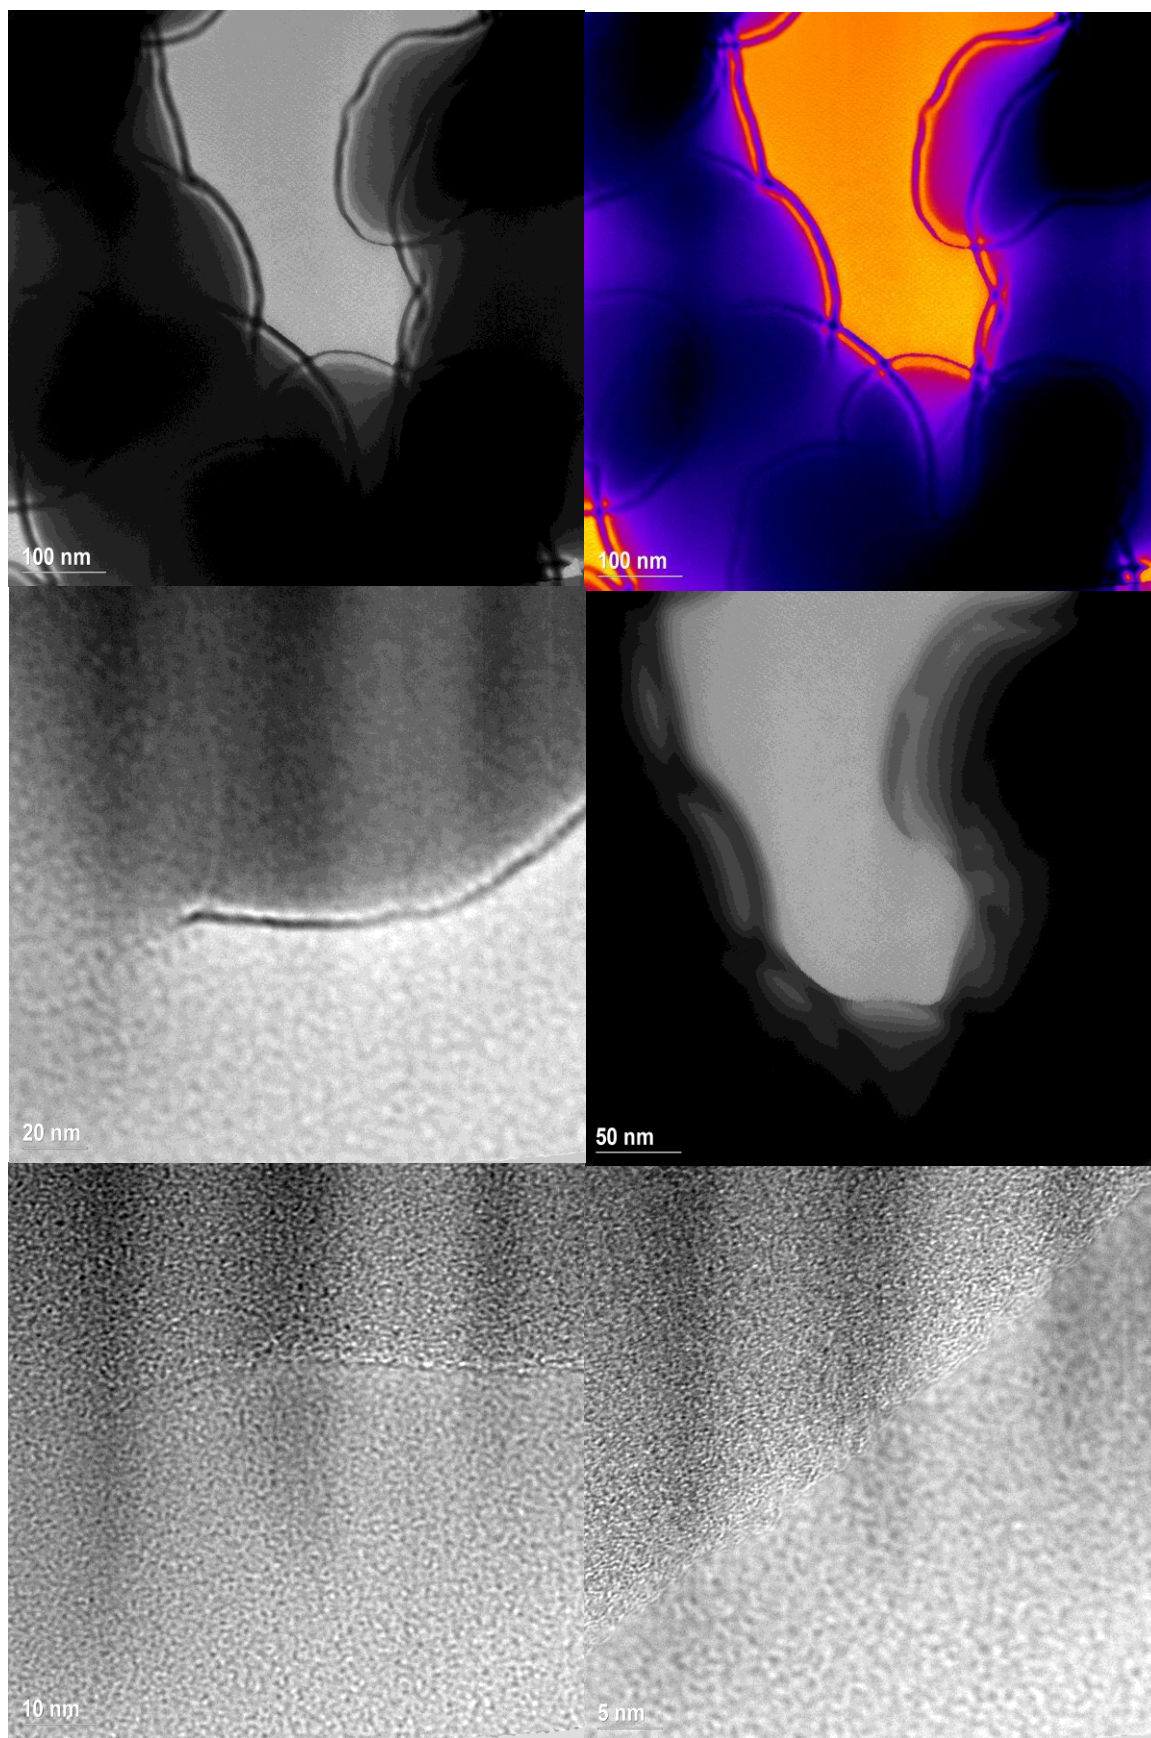

Fig. S3 TEM and HRTEM images of **1**.



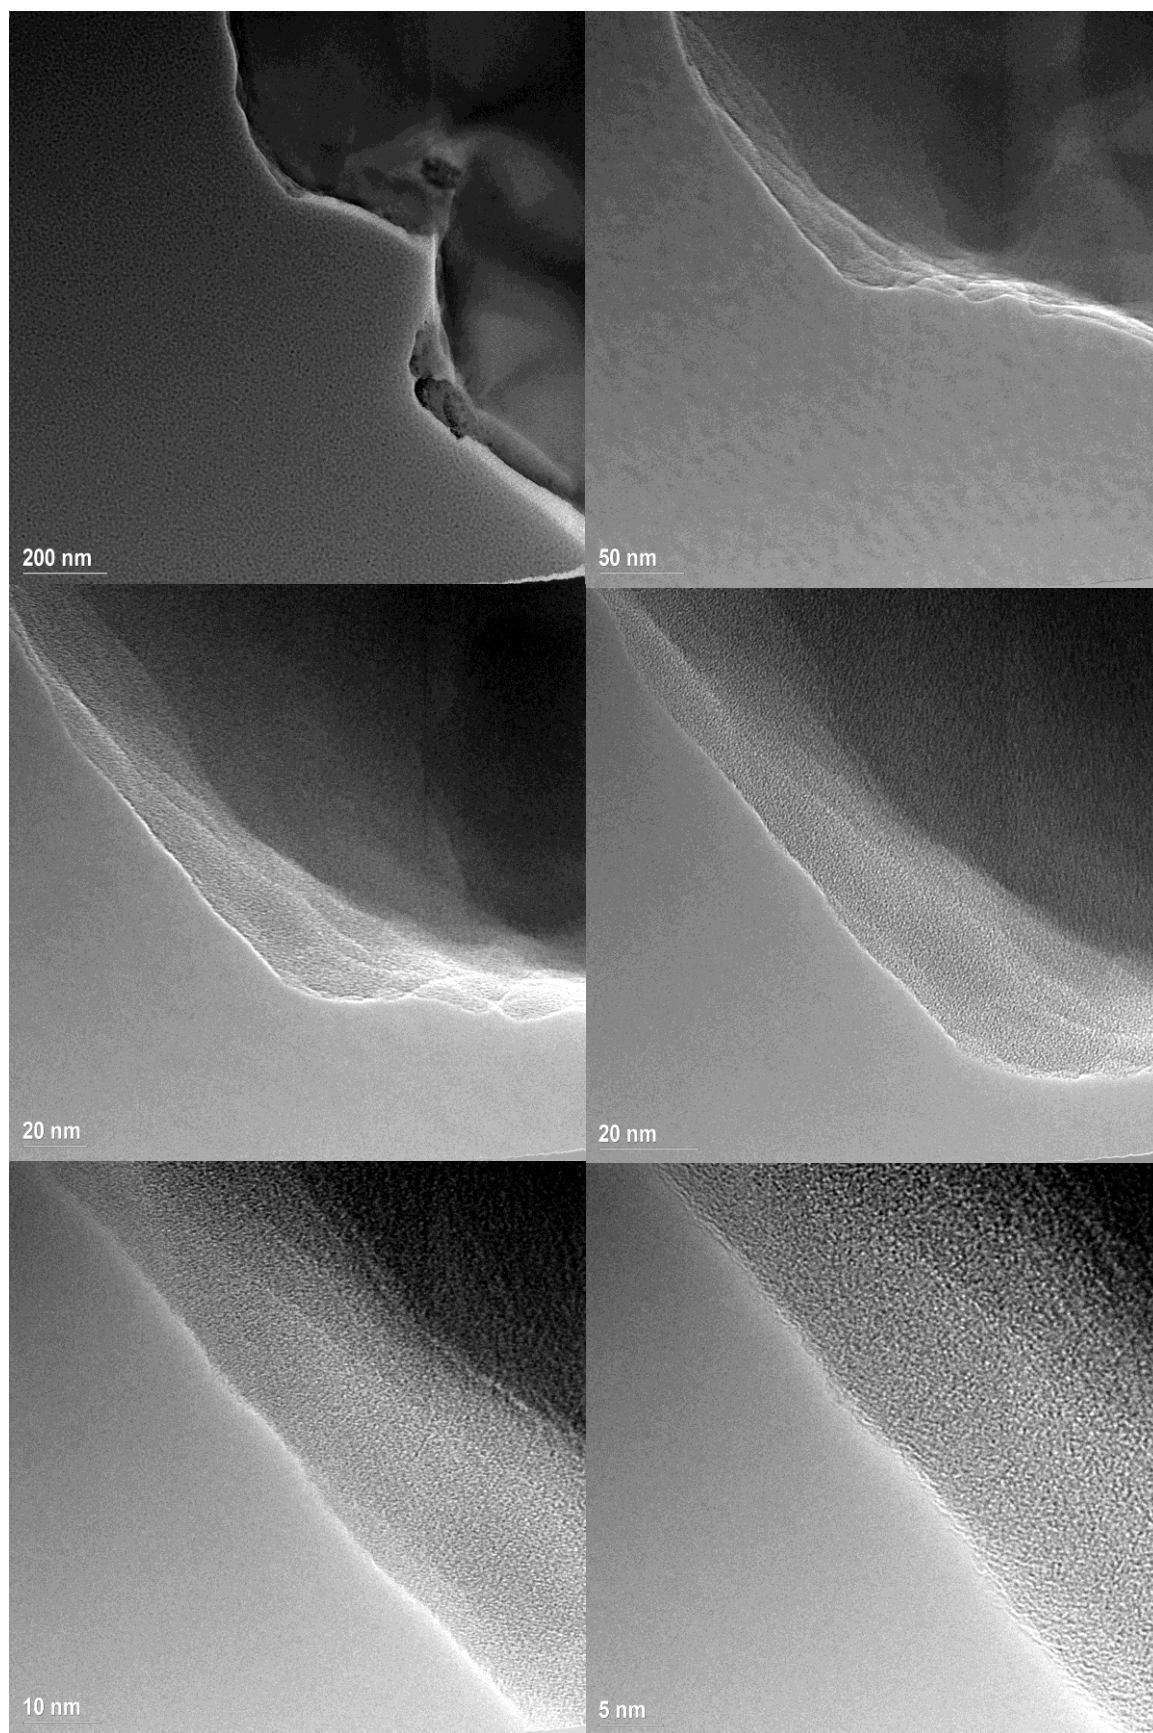

Fig. S4 TEM and HRTEM images of **2**.

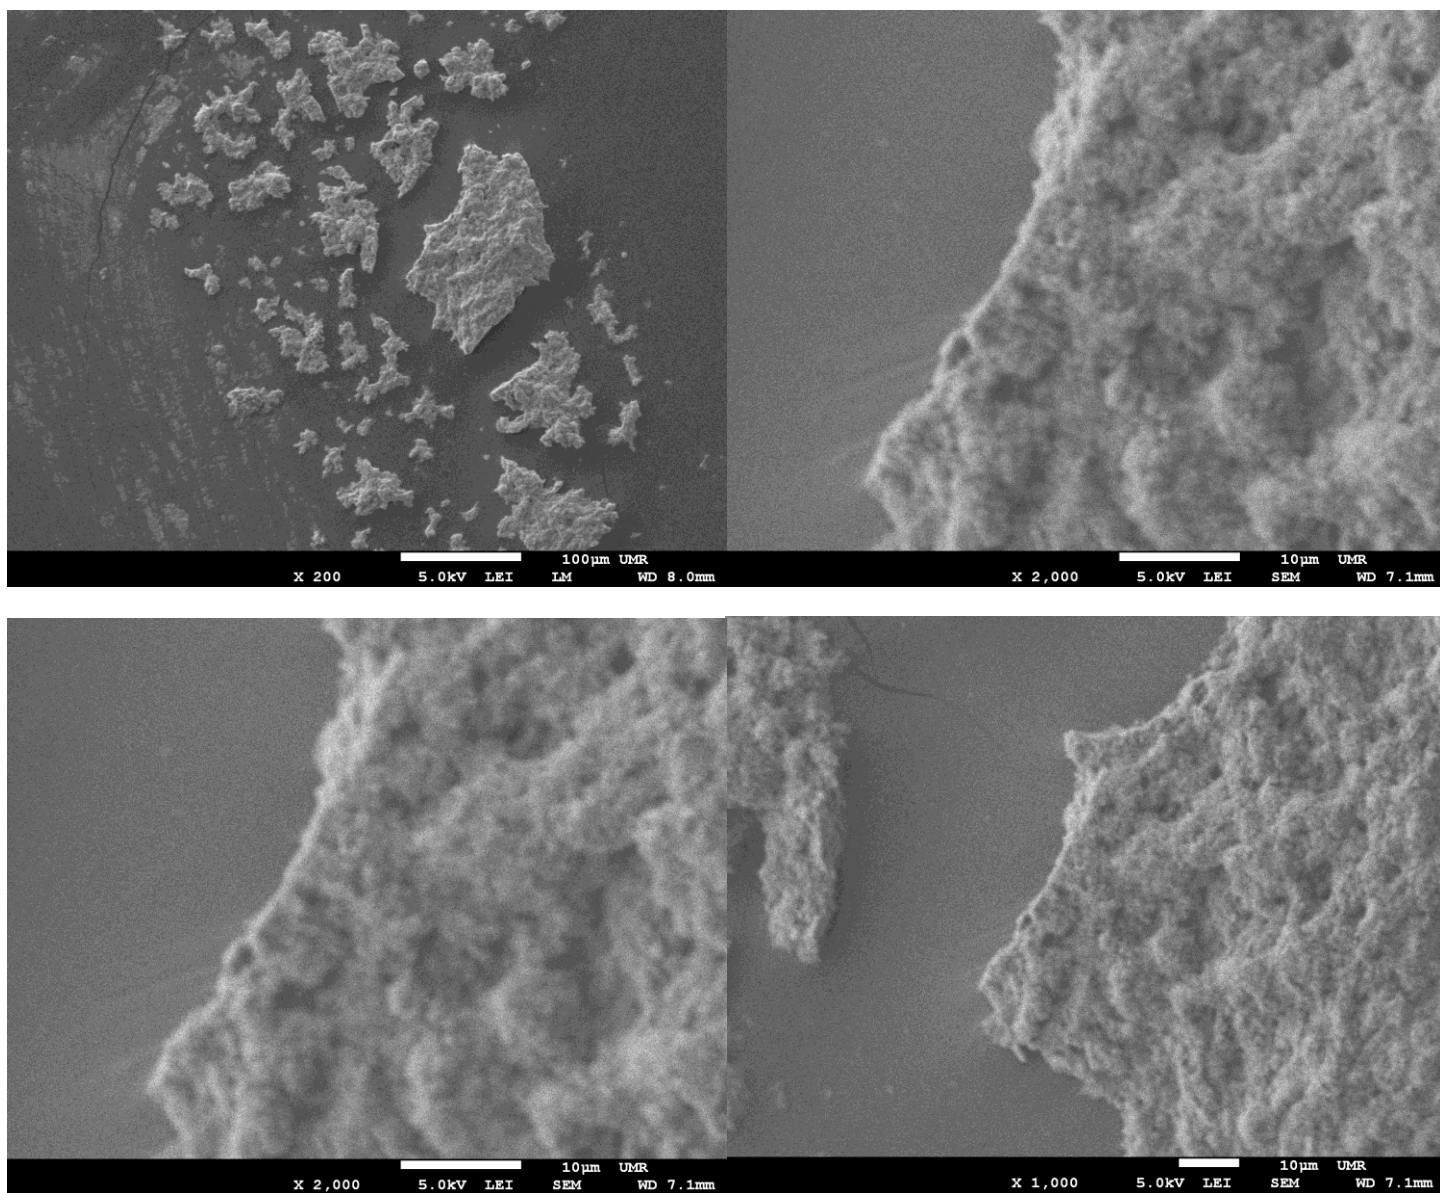

Fig. S5 SEM images of Mn oxide.

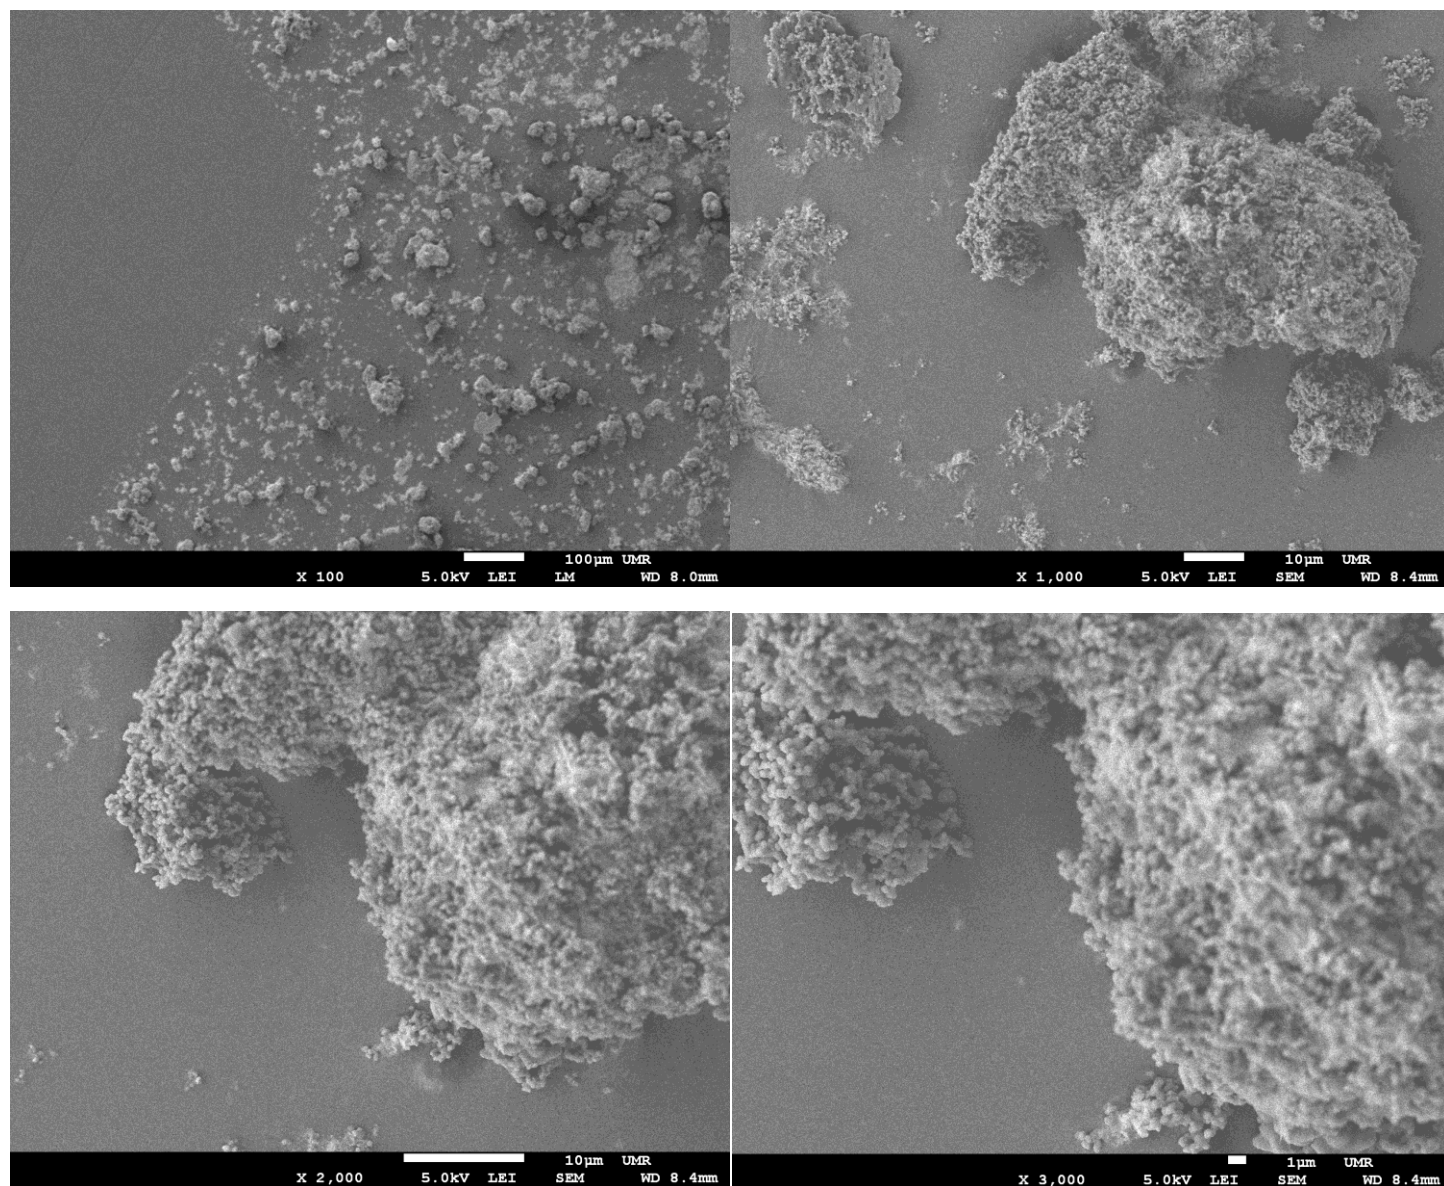

Fig. S6 SEM images of poly-L-tyrosine.



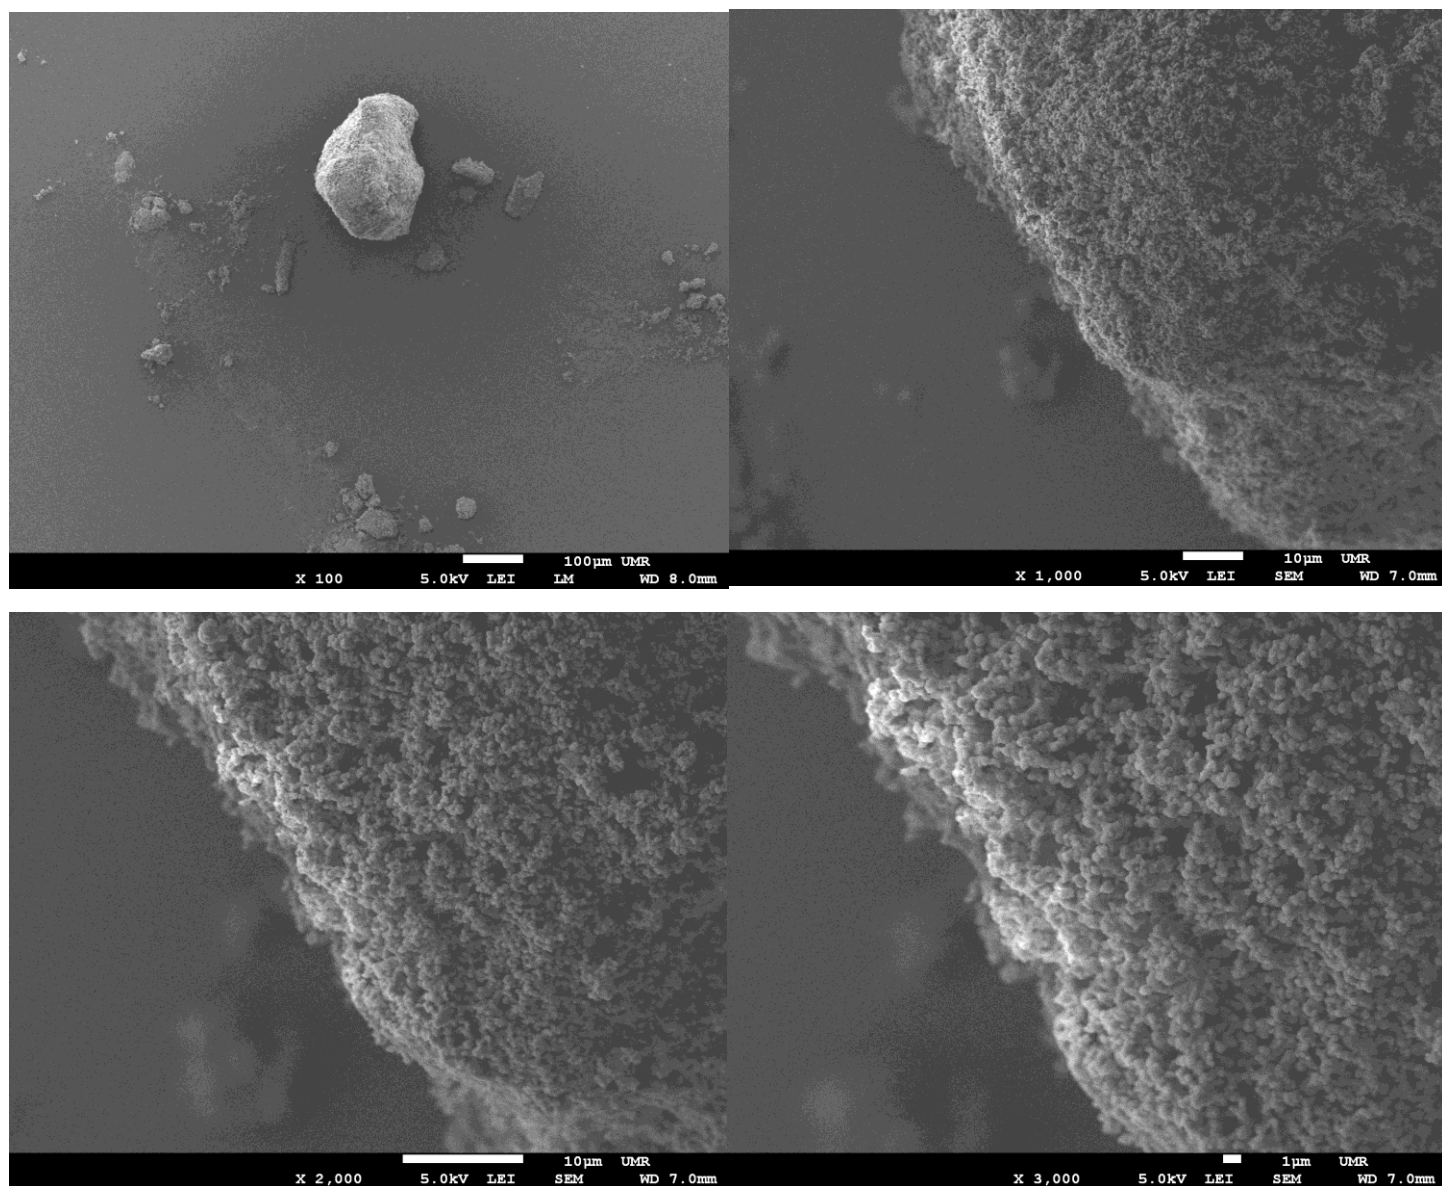

Fig. S7 SEM images of **1**.

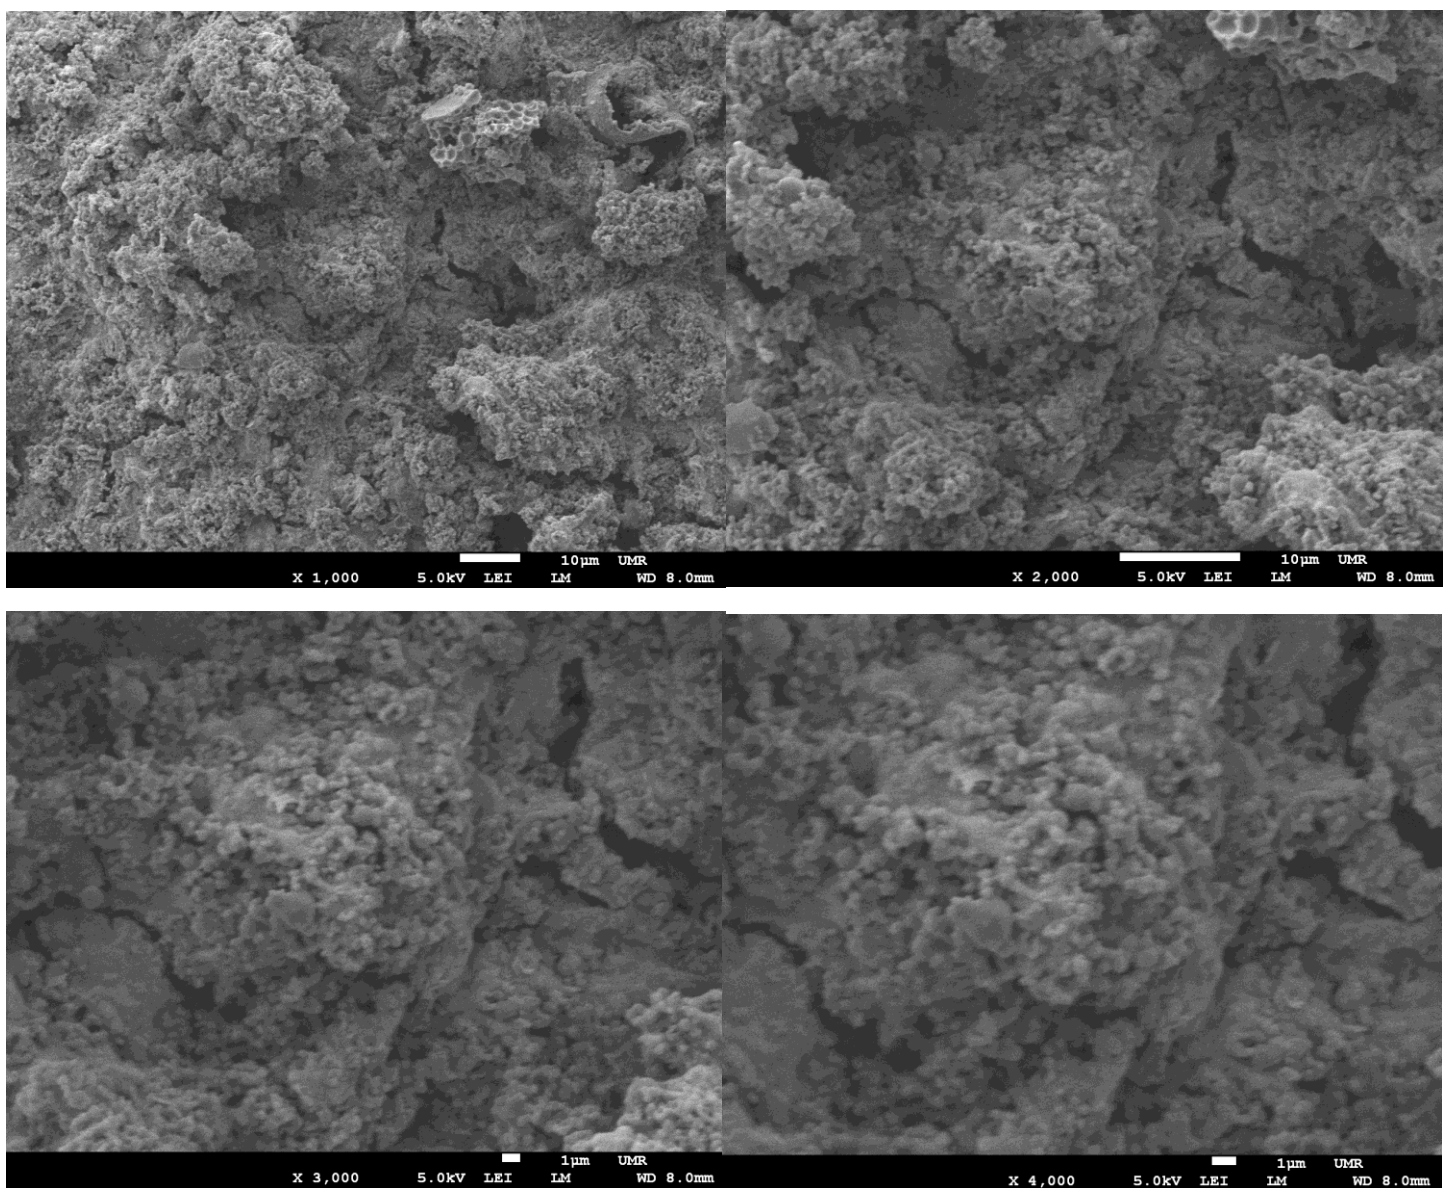

Fig. S8 SEM images of **2**.

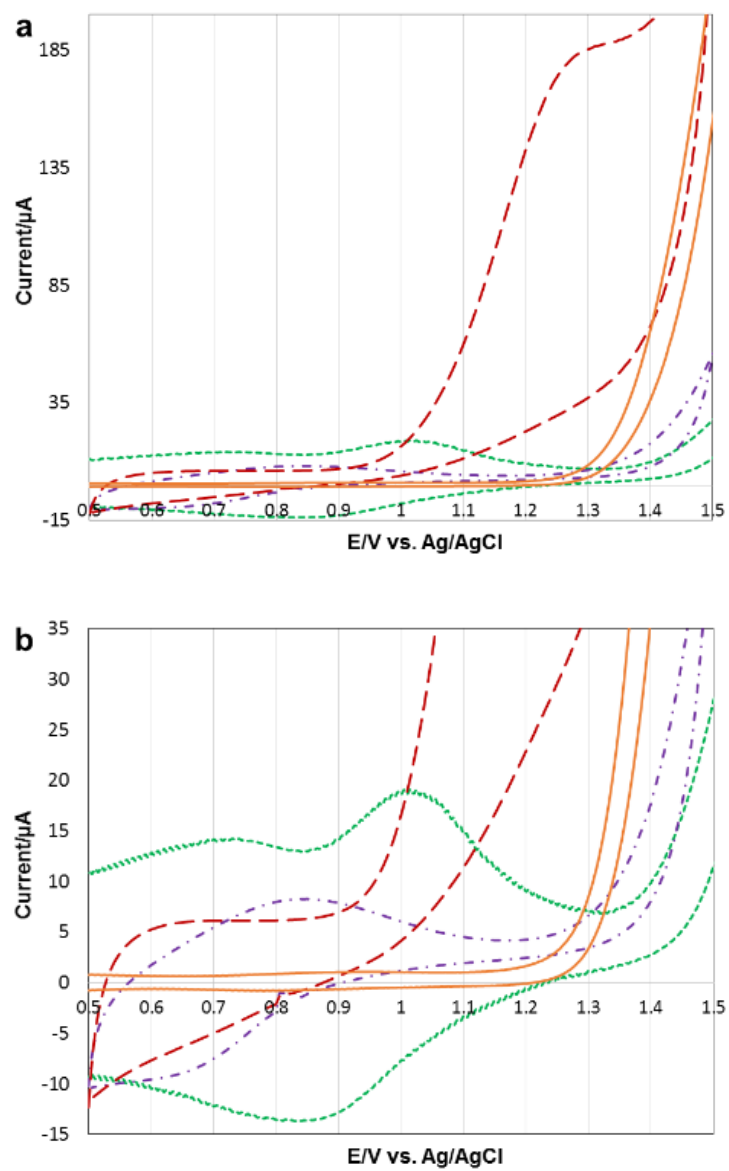

Fig. S9 Cyclic voltammograms of PTyr (orange), Mn oxide (green), **1** (blue) and **2** (red). Cyclic voltammograms are for the solutions in LiClO<sub>4</sub> (0.25 M in water, pH= 6.3).

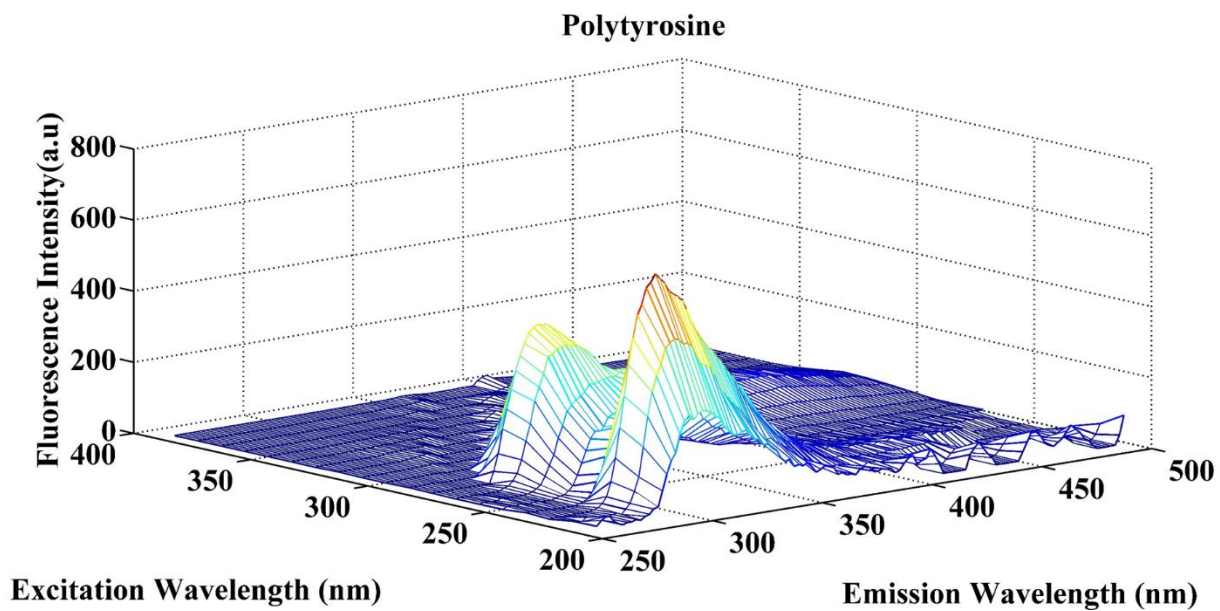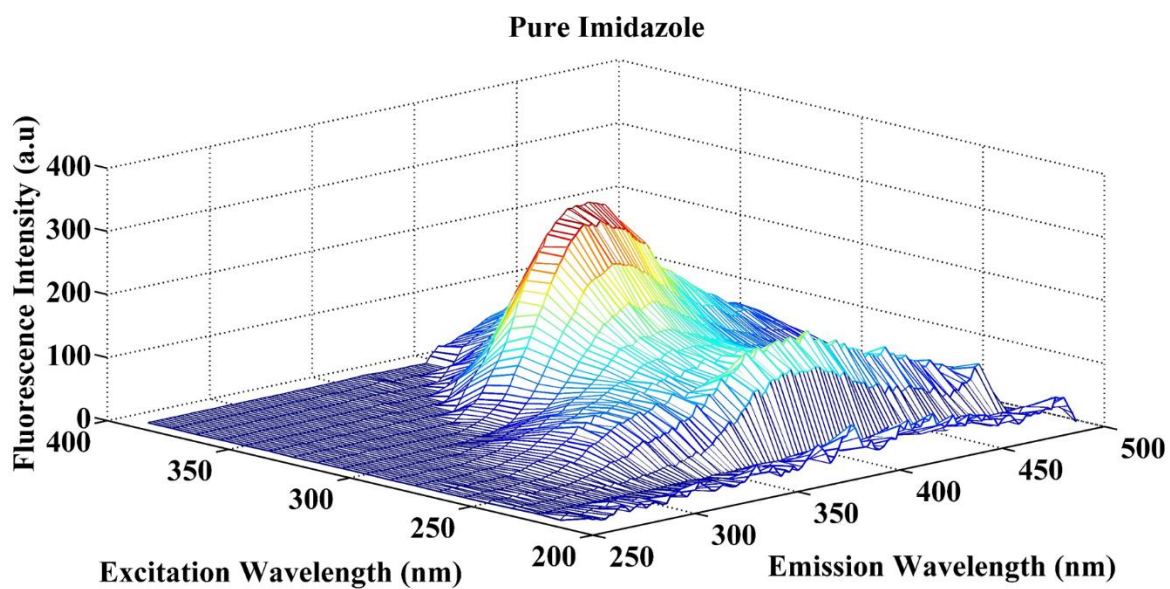

Fig. S10 The excitation-emission spectra of poly-L-tyrosine and pure imidazole.



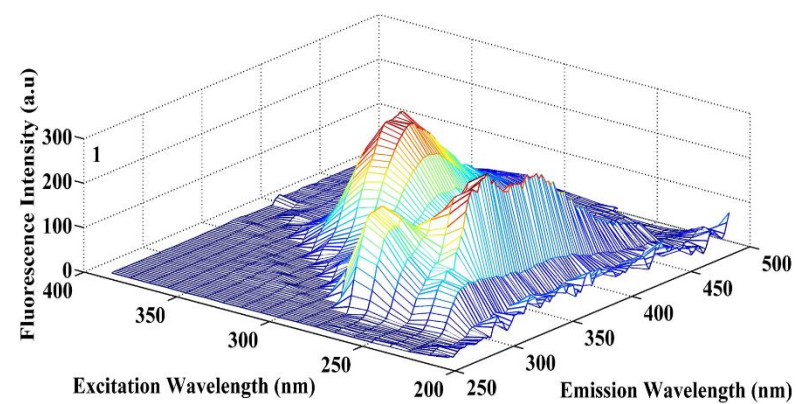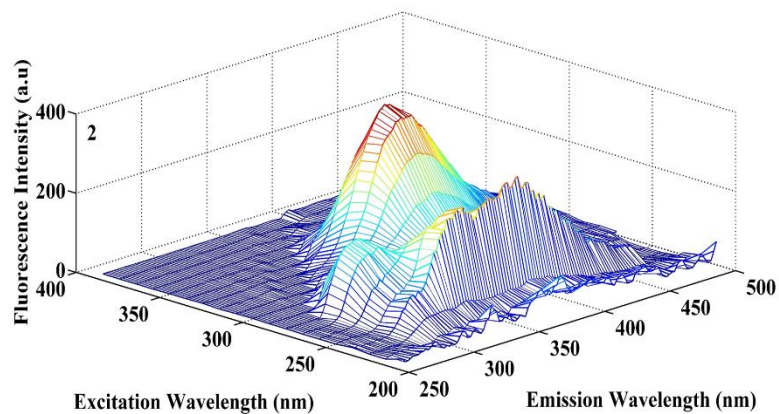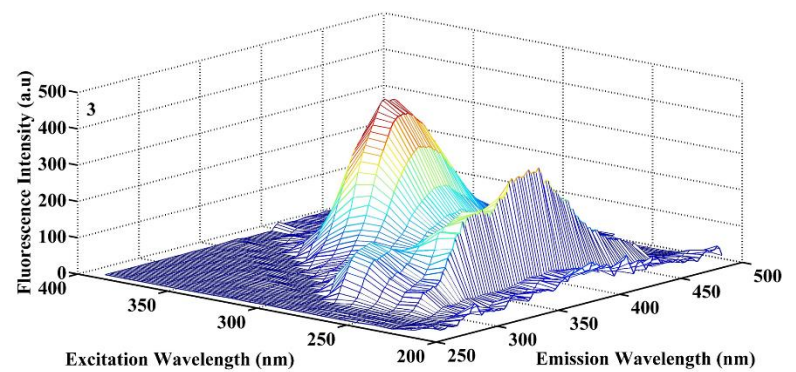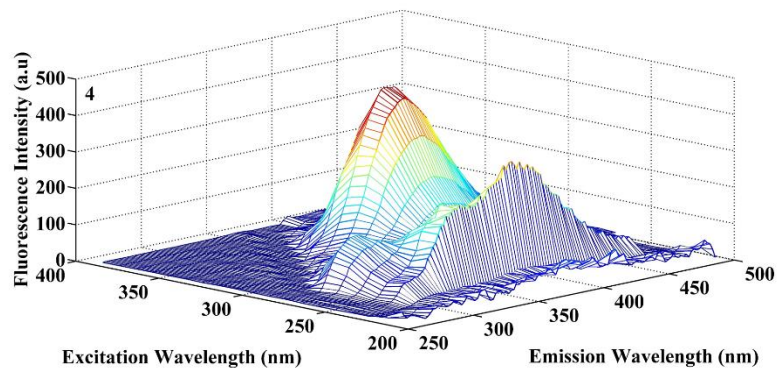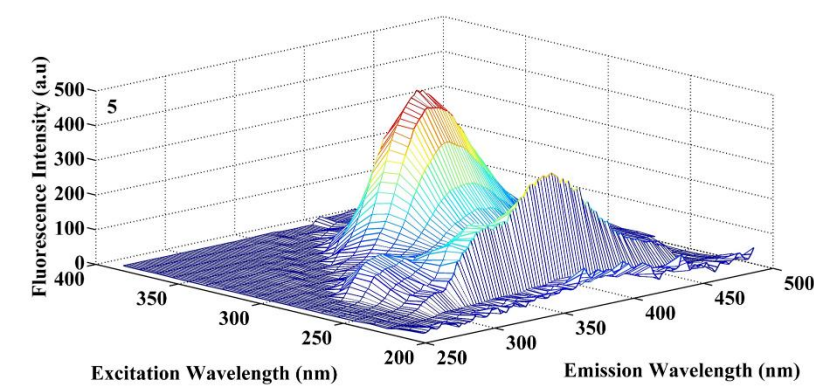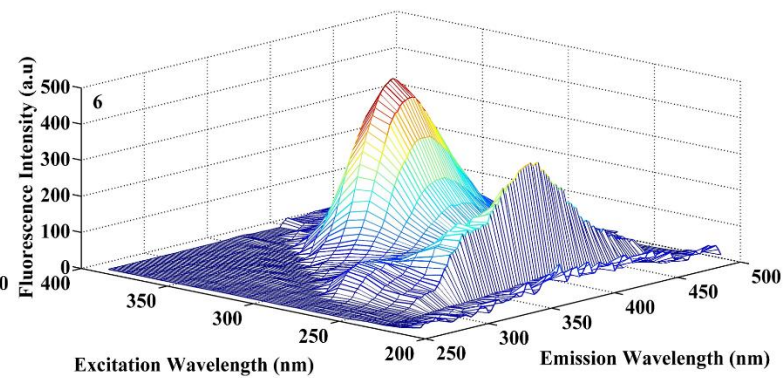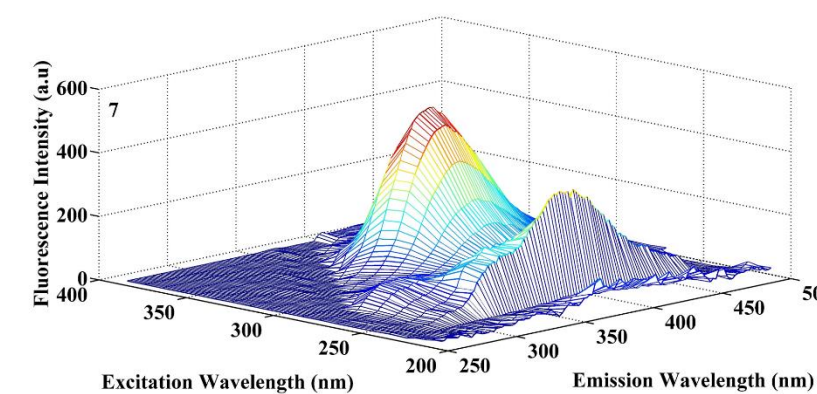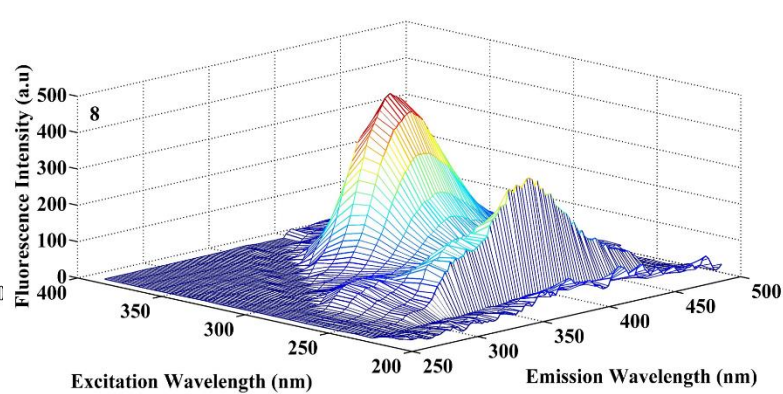



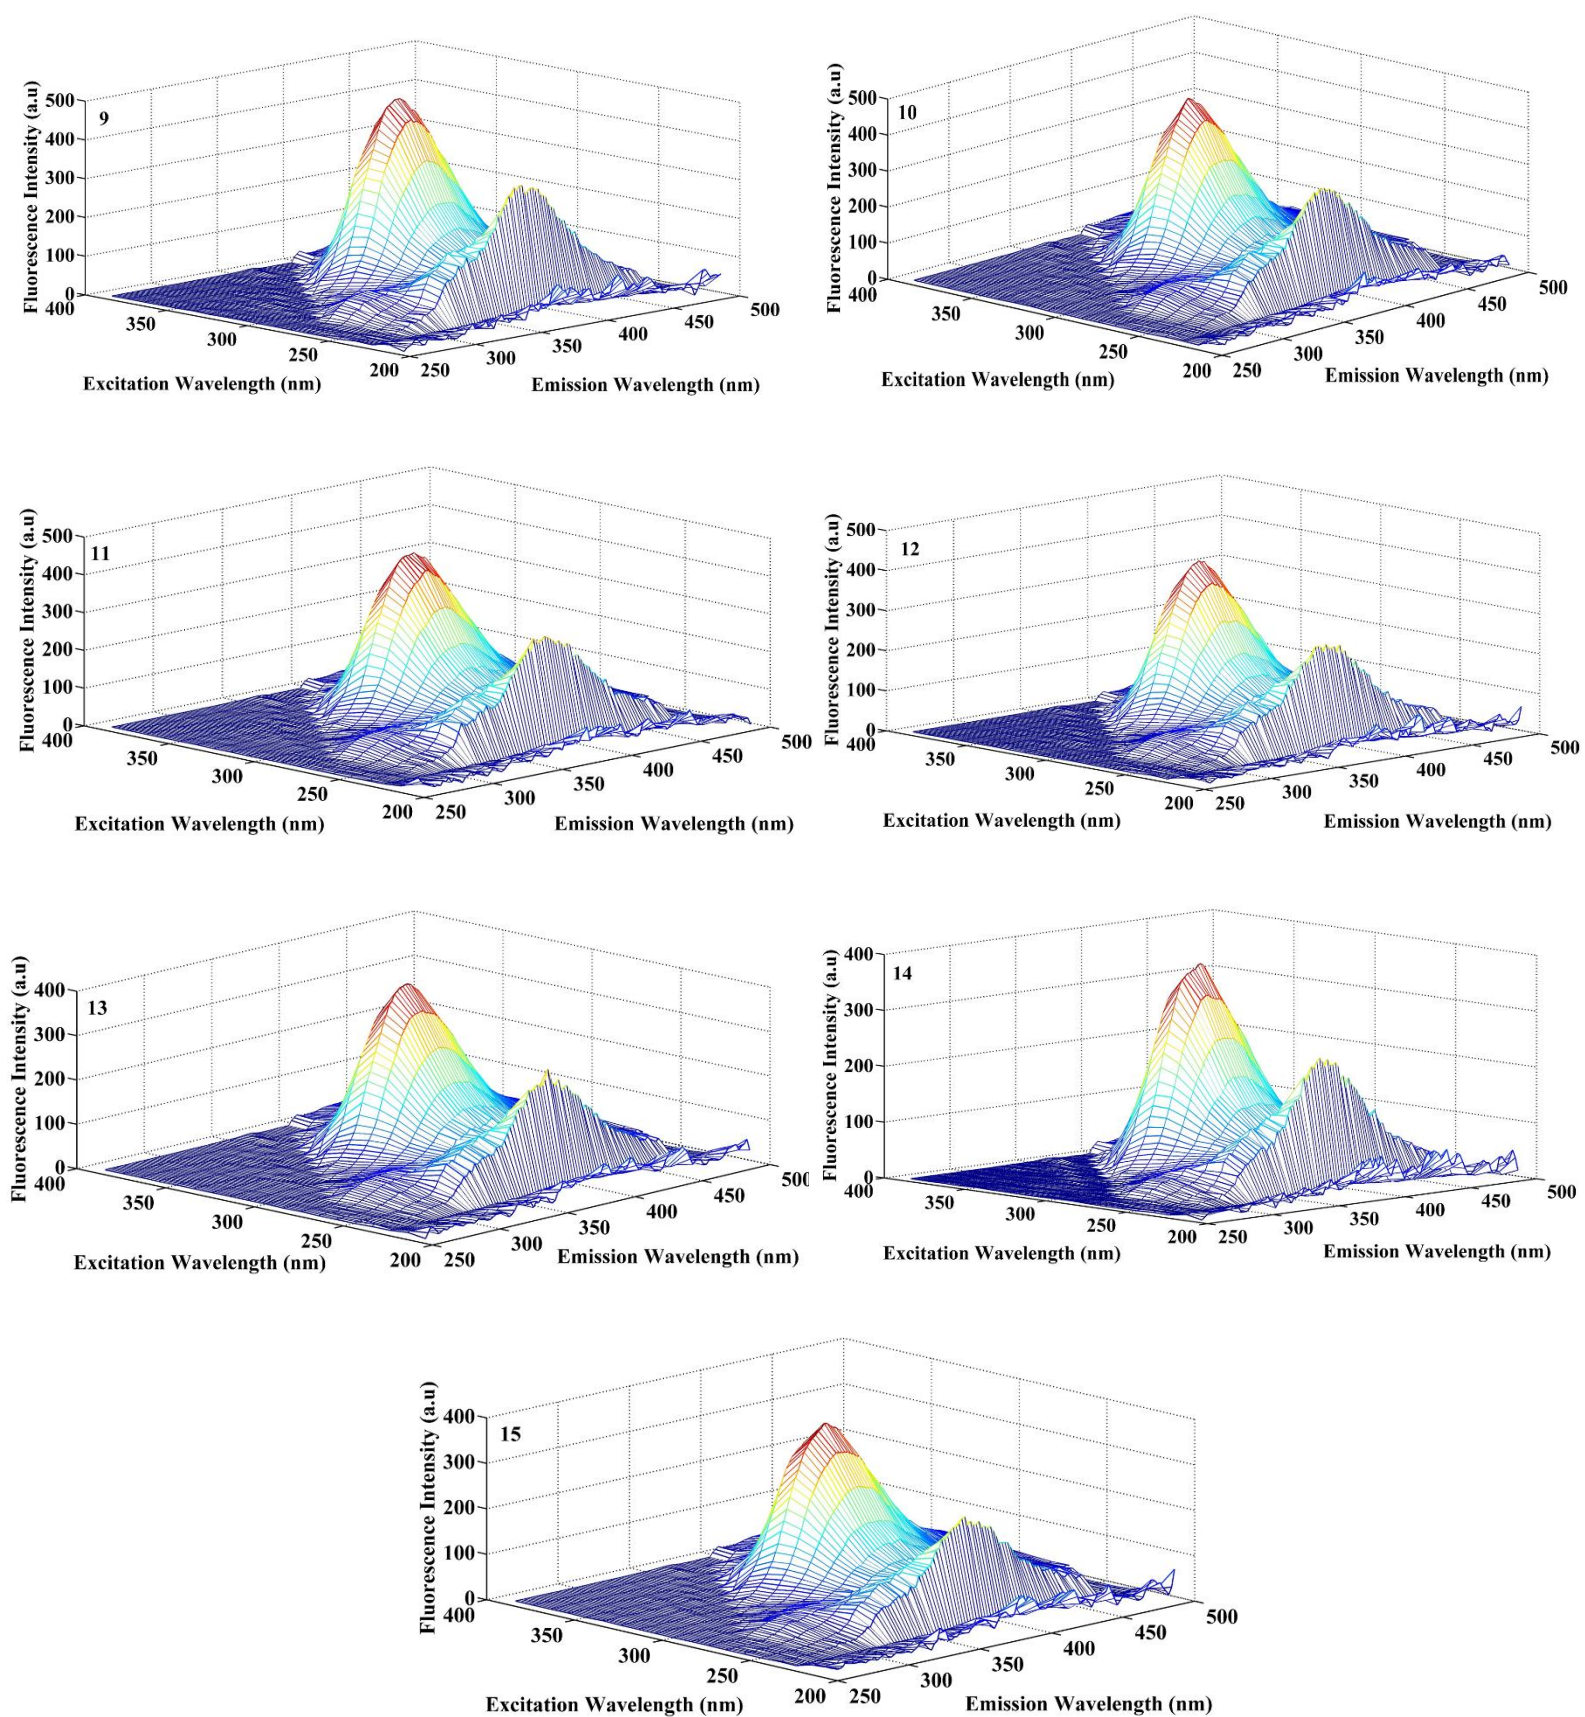

Fig. S11 The excitation-emission profiles of poly-L-tyrosine (initial volume = 25 ml and  $C = 0.1$  mg/ml) titration with imidazole (initial volume = 25 ml,  $C = 4$  mg/ml and volume added for any experiment = 50  $\mu$ l until 15 step) (continue).

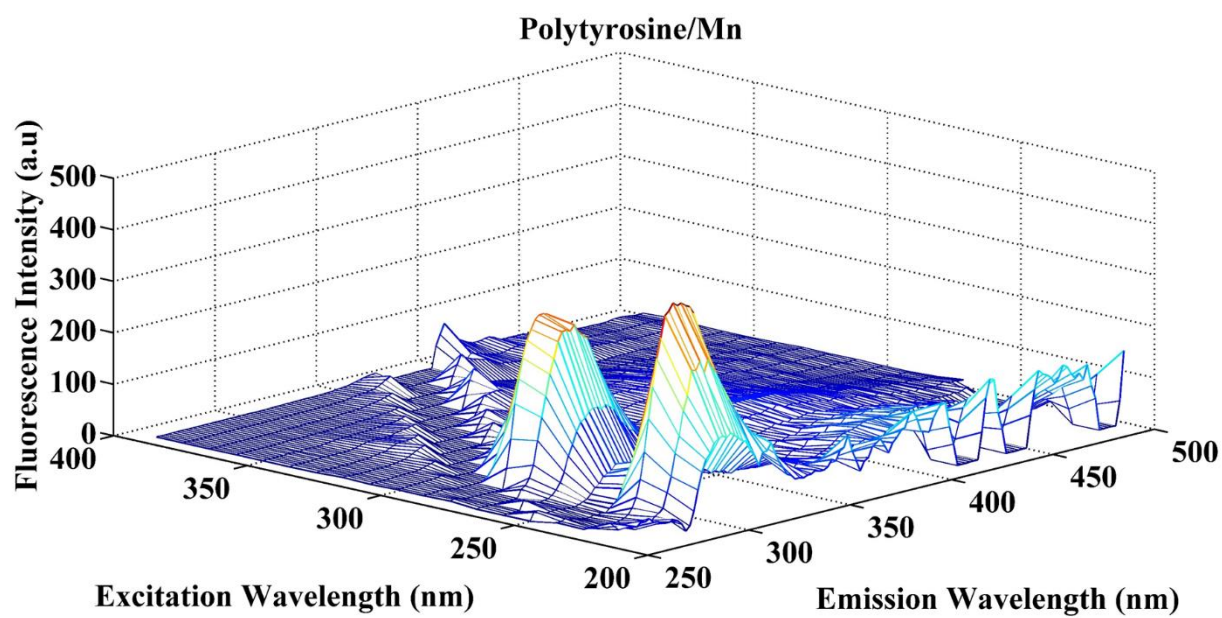

**Fig. S12** The excitation-emission profiles of poly-L-tyrosine/Mn and pure imidazole.



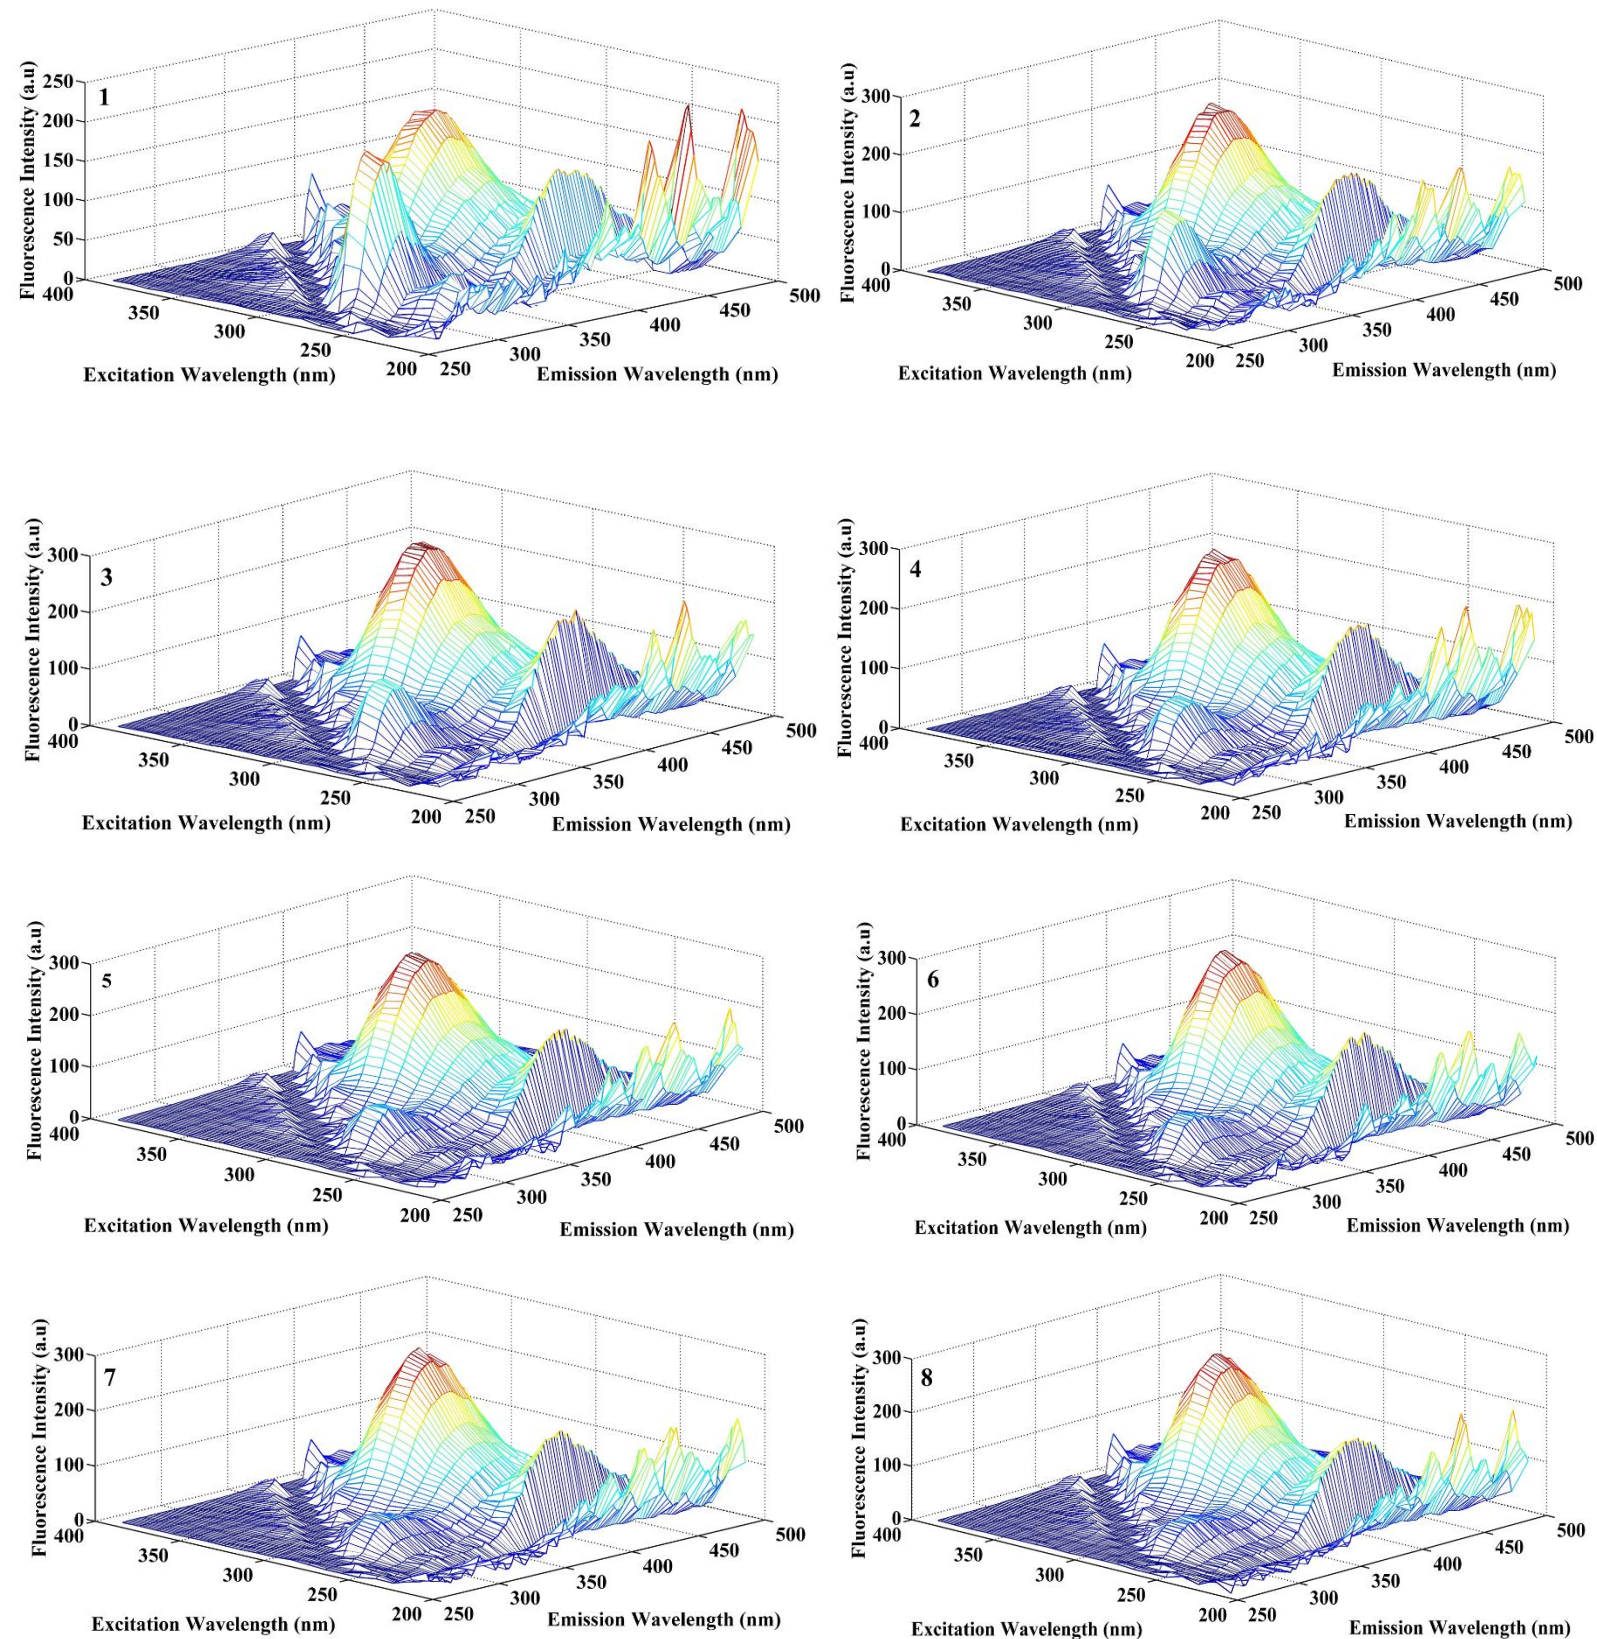

**Fig. S13** The excitation-emission profiles of Mn oxide/poly-L-tyrosine (initial volume= 25 ml and  $C = 0.3$  mg/ml) on titration with imidazole (initial volume = 25 ml,  $C = 4$  mg/ml and volume added for any experiment =  $50\ \mu\text{l}$  until the 15th step).



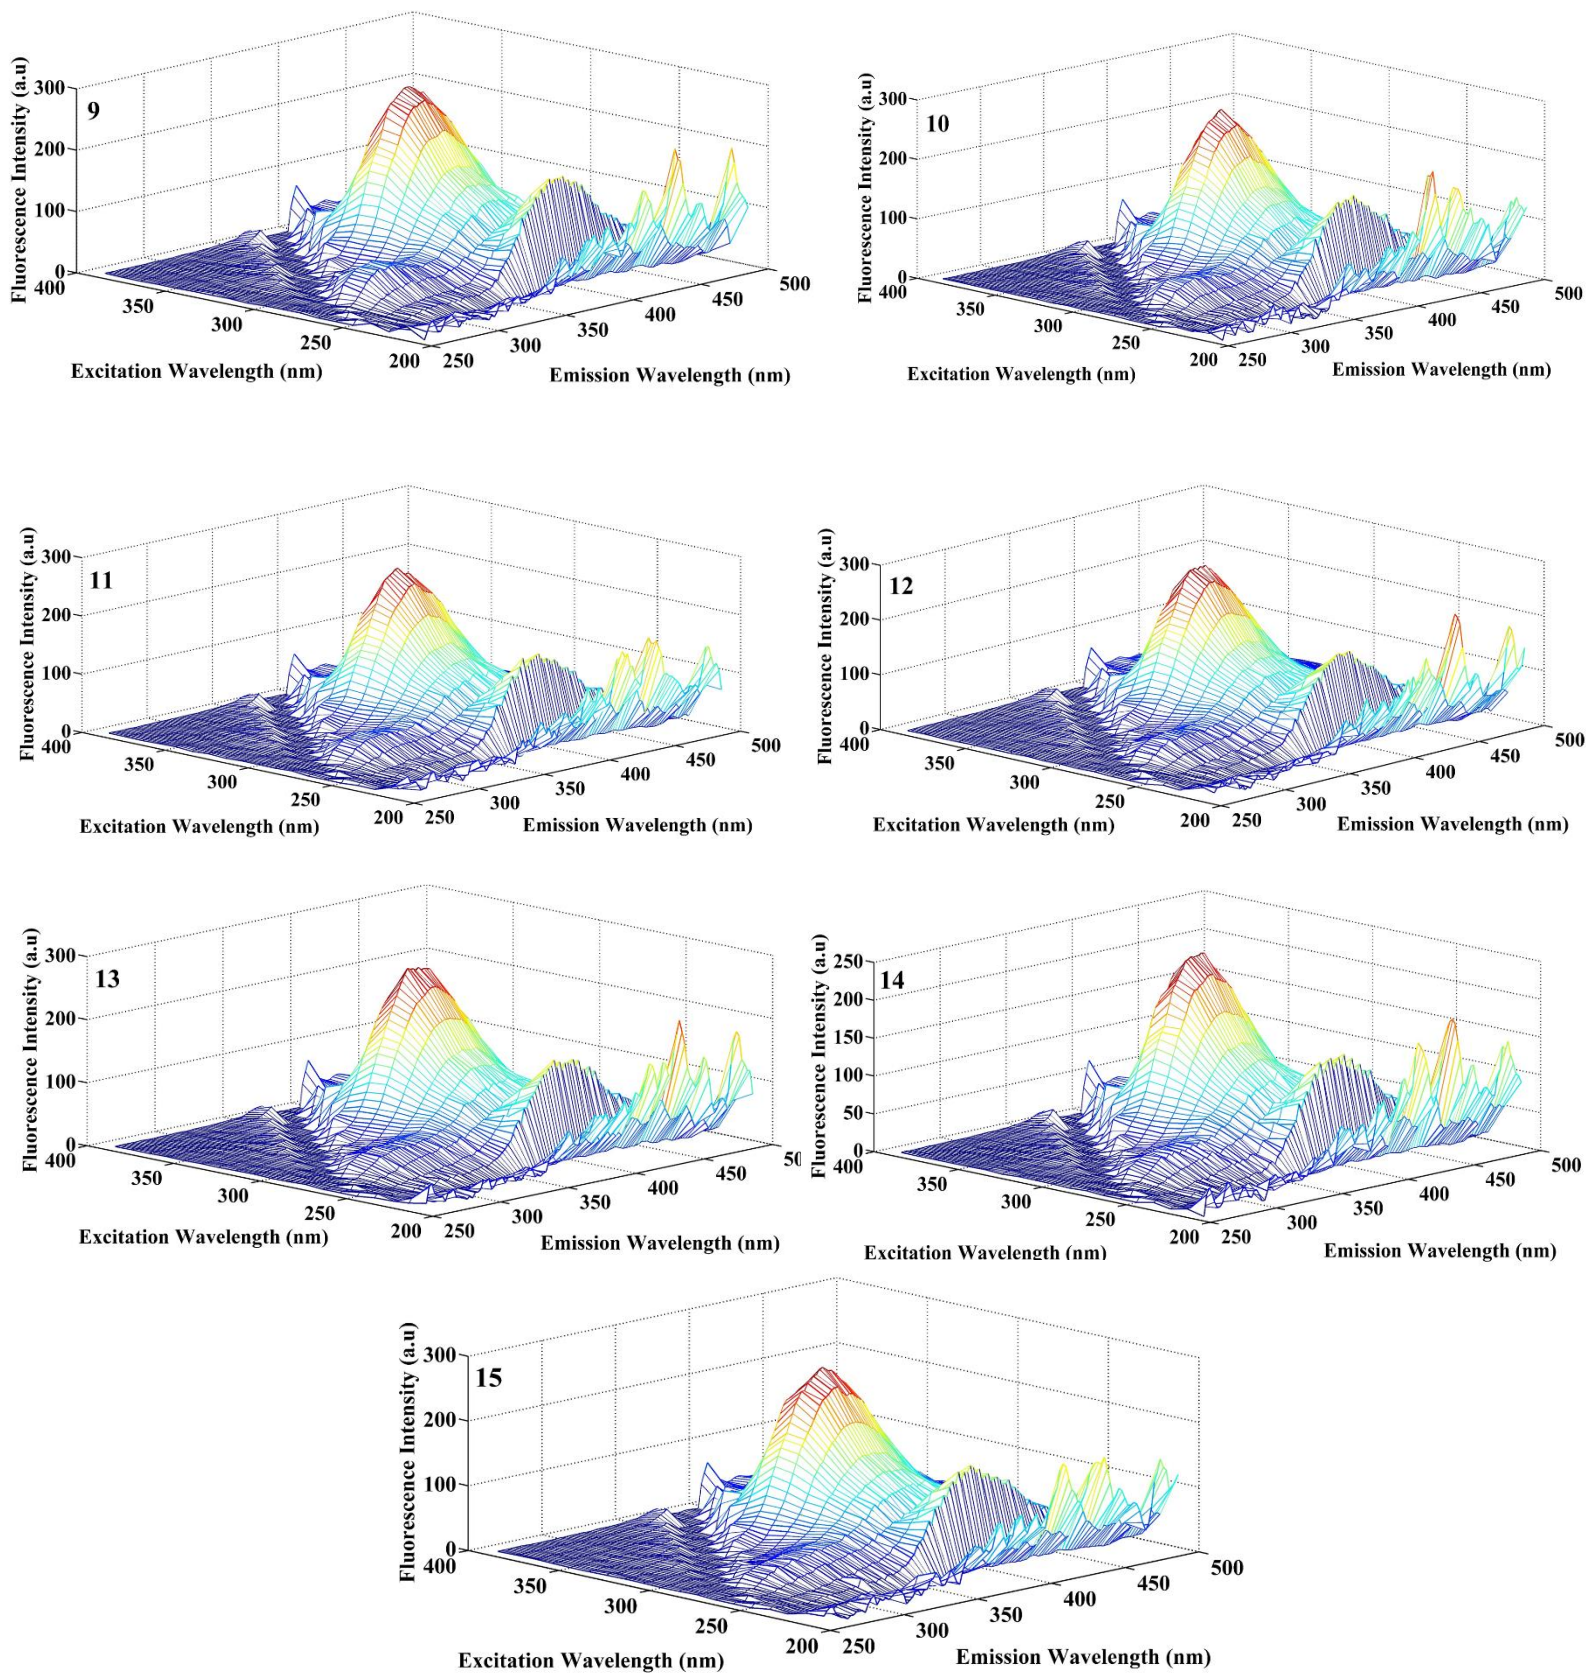

**Fig. S13** The excitation-emission profiles of Mn oxide/poly-L-tyrosine (initial volume= 25 ml and  $C = 0.3$  mg/ml) on titration with imidazole (initial volume = 25 ml,  $C = 4$  mg/ml and volume added for any experiment = 50  $\mu$ l until the 15th step) (continue).

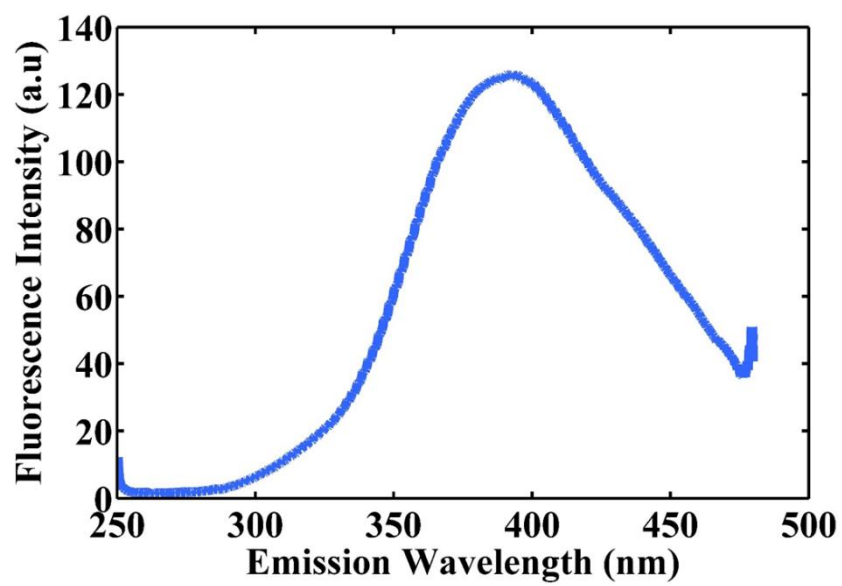

**Fig. S14** Emission spectra for pure imidazole.
